# Supplementary material for: The Epidemiology of Ocular Chlamydia trachomatis Infection within Districts Persistently Endemic for Trachoma in Amhara, Ethiopia
Source: PubMed Central journal article supplement (PMC11376115; doi:10.4269/ajtmh.23-0876), 2024-07-02
Supplement: tpmd230876.SD1.pdf [file tpmd230876.SD1.pdf]

Supplemental Figure 1. Administrative mass drug administration (MDA) coverage by district, 2009-2019, Amhara, Ethiopia, 2019

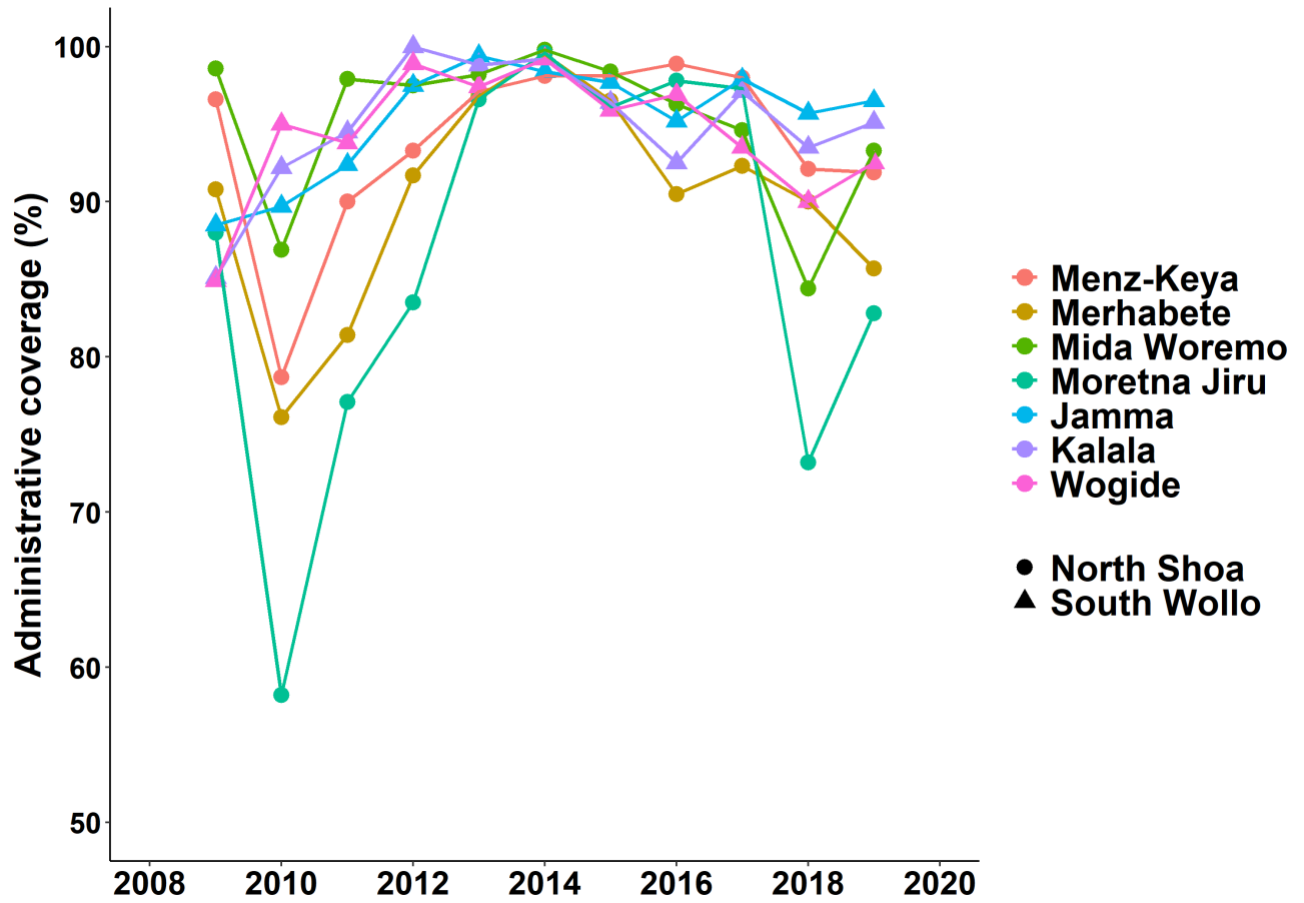

Administrative coverage defined as the total number of doses distributed divided by the targeted population.

Supplemental Figure 2. Age specific prevalence of trichomatous inflammation-follicular (TF) and trichomatous inflammation-intense (TI) among children ages 1 to 15 years across 7 districts of Amhara, Ethiopia, 2019

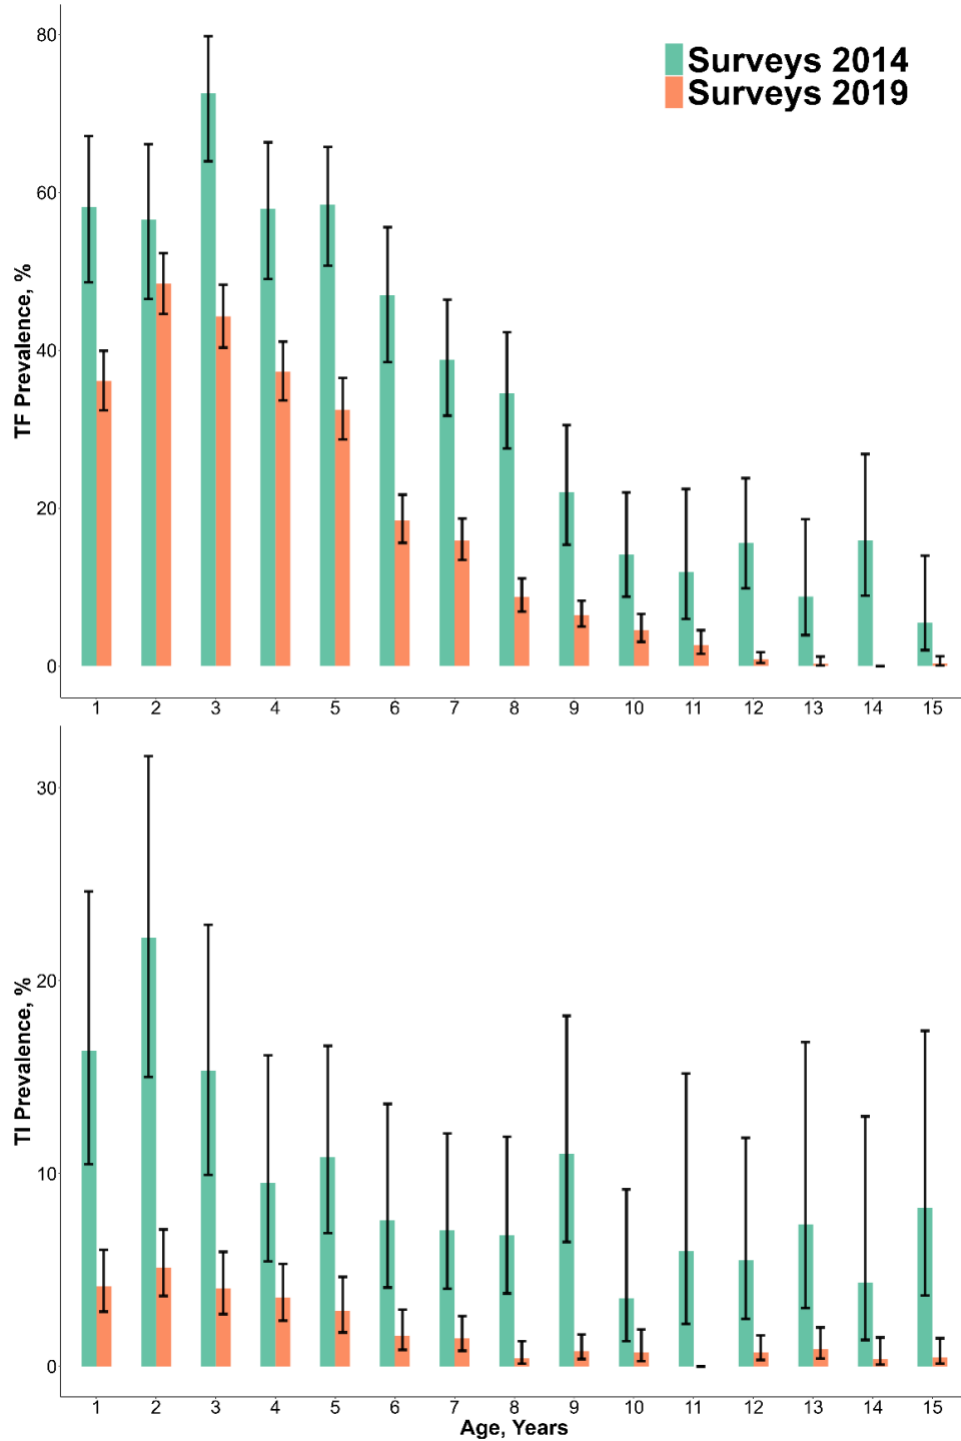

Supplemental Figure 3. Maps of spatial density and clustering among 3 survey districts using kernel estimation of a) trachomatous inflammation-follicular (TF) density and b) non-TF density, Amhara, Ethiopia, 2019

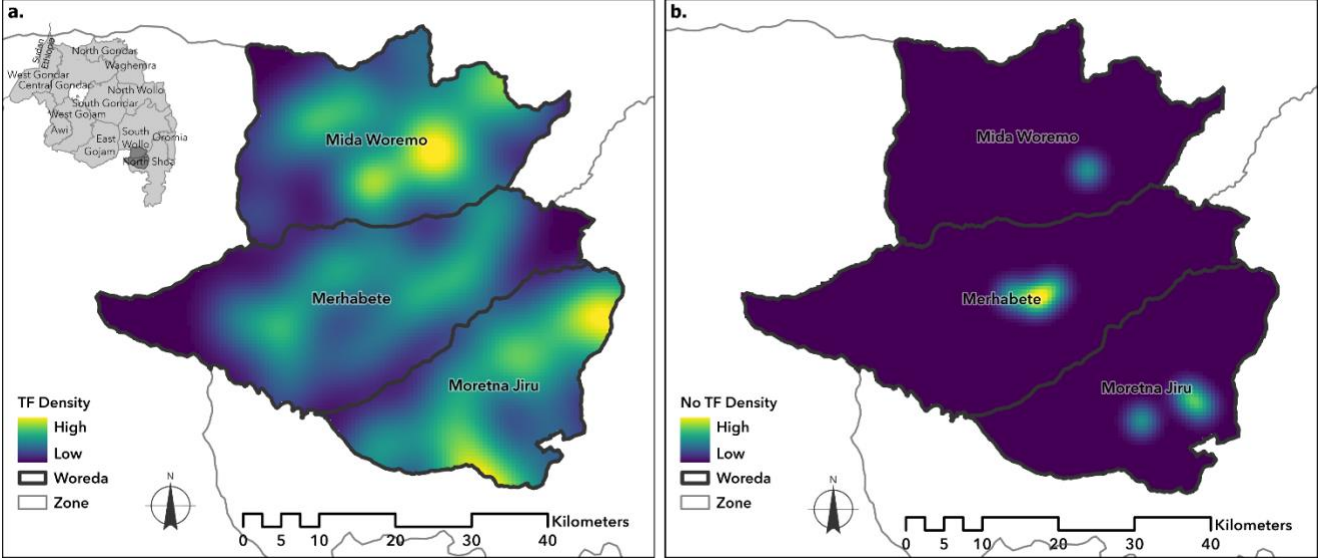

Supplemental Figure 4. Distribution of *Chlamydia trachomatis* elementary body load, Amhara, Ethiopia, 2019

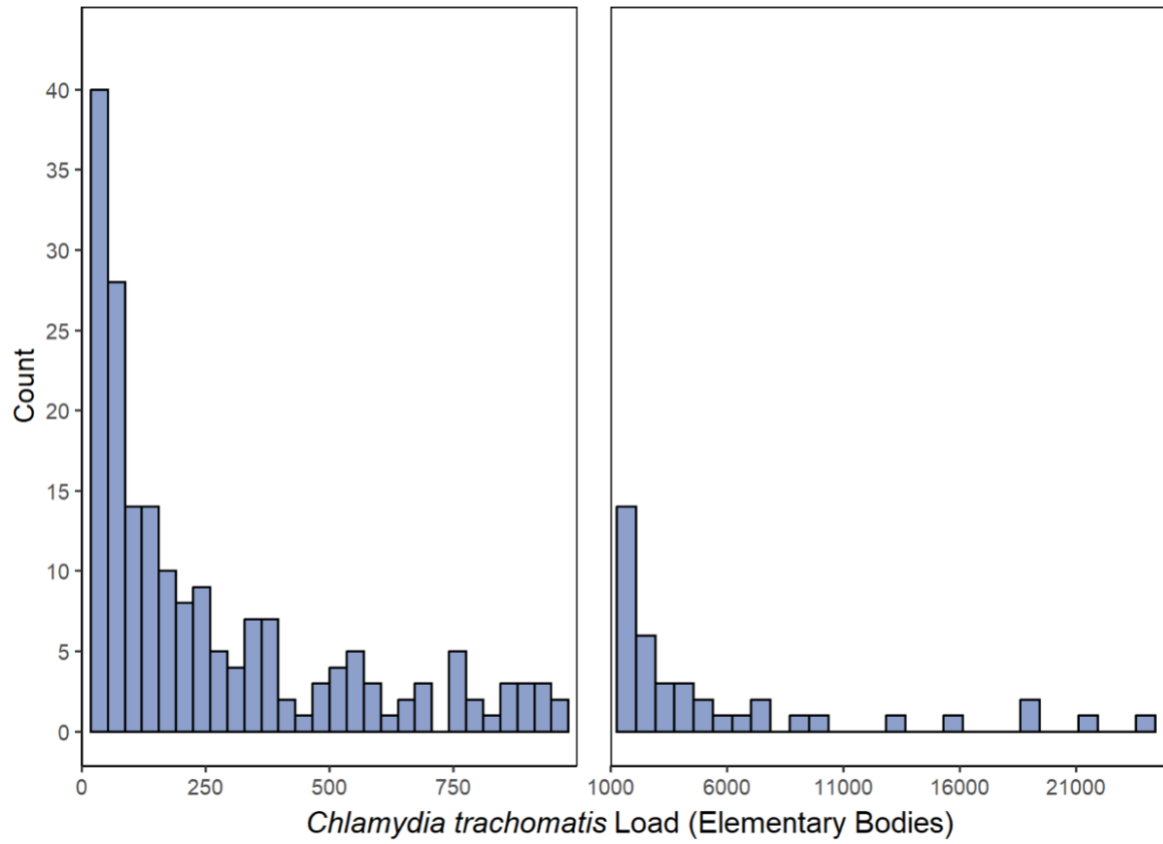

Supplemental Table 1. District prevalence of water, sanitation, and hygiene indicators, Amhara, Ethiopia, 2019

| District       | Clean face, ages 1-9<br>years (95% CI) | Presence of latrine<br>(95% CI) | Improved water<br>source (95% CI) | Access to water < 30<br>minutes (95% CI) |
|----------------|----------------------------------------|---------------------------------|-----------------------------------|------------------------------------------|
| Menz-Keya      | 59.4 (51.1, 67.4)                      | 36.6 (27.4, 45.7)               | 47.2 (31.6, 63.0)                 | 26.2 (15.2, 36.8)                        |
| Merhabete      | 63.4 (54.9, 71.9)                      | 22.9 (14.0, 33.2)               | 69.2 (56.3, 85.8)                 | 22.6 (11.8, 36.0)                        |
| Mida<br>Woremo | 66.4 (58.4, 74.3)                      | 34.4 (25.0, 44.4)               | 45.2 (28.8, 61.9)                 | 21.4 (11.7, 33.9)                        |
| Moretna Jiru   | 65.9 (58.7, 72.7)                      | 40.7 (30.1, 51.6)               | 57.0 (41.6, 74.5)                 | 23.6 (11.0, 36.2)                        |
| Jamma          | 70.8 (61.7, 79.3)                      | 64.3 (54.0, 74.3)               | 71.6 (57.9, 86.6)                 | 26.3 (14.3, 38.2)                        |
| Kalala         | 69.6 (61.8, 77.2)                      | 43.8 (31.8, 56.1)               | 48.3 (32.0, 65.8)                 | 23.1 (11.1, 35.3)                        |
| Wogide         | 68.2 (61.3, 74.6)                      | 38.7 (27.3, 50.6)               | 75.0 (58.8, 88.8)                 | 30.2 (16.1, 42.8)                        |
